# Supplementary material for: Racial differences in prostate inflammation: results from the REDUCE study
Source: PubMed Central journal article supplement (PMC5641057; doi:10.18632/oncotarget.10690), 2016-07-18
Supplement: oncotarget-08-71393-s001.pdf [file oncotarget-08-71393-s001.pdf]

# Racial differences in prostate inflammation: results from the REDUCE study

## Supplementary Material

Supplementary Table 1: Sensitivity analysis among none or mild prostatitis patients (N=5025)

| Patient Race | Total No. (%) | Acute Inflammation |             |                   |             | Chronic Inflammation |             |                   |             |
|--------------|---------------|--------------------|-------------|-------------------|-------------|----------------------|-------------|-------------------|-------------|
|              |               | Univariable        |             | Multivariable*    |             | Univariable          |             | Multivariable*    |             |
|              |               | OR (95% CI)        | P-Value     | OR (95% CI)       | P-value     | OR (95% CI)          | P-value     | OR (95% CI)       | P-value     |
| White        | 4538 (90.3)   | <i>Ref.</i>        | <i>Ref.</i> | <i>Ref.</i>       | <i>Ref.</i> | <i>Ref.</i>          | <i>Ref.</i> | <i>Ref.</i>       | <i>Ref.</i> |
| Black        | 128 (2.6)     | 0.75 (0.45, 1.26)  | 0.284       | 0.60 (0.35, 1.01) | 0.055       | 1.27 (0.80, 2.03)    | 0.307       | 1.14 (0.70, 1.88) | 0.593       |
| Asian        | 116 (2.3)     | 1.49 (0.96, 2.31)  | 0.072       | 1.52 (0.96, 2.42) | 0.074       | 1.13 (0.71, 1.81)    | 0.611       | 1.04(0.64, 1.69)  | 0.872       |
| Hispanic     | 243 (4.8)     | 0.77 (0.53, 1.13)  | 0.180       | 0.90(0.59, 1.36)  | 0.610       | 1.05 (0.76, 1.44)    | 0.780       | 0.90 (0.63, 1.29) | 0.570       |

Abbreviations: 95% CI, 95% confidence interval; OR odds ratio.

\*Adjusted for baseline age, race, region, DRE (digital rectal examination), prostate volume, PSA (prostate-specific antigen), smoking, aspirin/NSAID use, and biopsy results.

**Supplementary Table 2: Association between Baseline Inflammation and Race Stratified by NSAID use**

| Patient Race           | Total No. (%) | Acute Inflammation |              |                   |              | Chronic Inflammation |              |                   |         |
|------------------------|---------------|--------------------|--------------|-------------------|--------------|----------------------|--------------|-------------------|---------|
|                        |               | Univariable        |              | Multivariable*    |              | Univariable          |              | Multivariable*    |         |
|                        |               | OR (95% CI)        | P-Value      | OR (95% CI)       | P-value      | OR (95% CI)          | P-value      | OR (95% CI)       | P-value |
| <b>Non-NSAID Users</b> |               |                    |              |                   |              |                      |              |                   |         |
| White                  | 5192 (91.4)   | <i>Ref.</i>        |              | <i>Ref.</i>       |              | <i>Ref.</i>          |              | <i>Ref.</i>       |         |
| Black                  | 114 (2.0)     | 0.61 (0.33, 1.14)  | 0.123        | 0.42 (0.22, 0.82) | <b>0.012</b> | 1.72 (1.02, 2.89)    | <b>0.040</b> | 1.26 (0.73, 2.15) | 0.406   |
| Asian                  | 106 (1.9)     | 2.05 (1.32, 3.18)  | <b>0.001</b> | 1.82 (1.13, 2.93) | <b>0.014</b> | 1.30 (0.79, 2.12)    | 0.297        | 1.10 (0.66, 1.83) | 0.726   |
| Hispanic               | 269 (4.7)     | 1.03 (0.73, 1.45)  | 0.874        | 1.20 (0.81, 1.77) | 0.365        | 1.29 (0.94, 1.76)    | 0.109        | 1.07 (0.75, 1.52) | 0.710   |
| <b>NSAID Users</b>     |               |                    |              |                   |              |                      |              |                   |         |
| White                  | 2079 (93.7)   | <i>Ref.</i>        |              | <i>Ref.</i>       |              | <i>Ref.</i>          |              | <i>Ref.</i>       |         |
| Black                  | 66 (3.0)      | 1.25 (0.68, 2.33)  | 0.472        | 1.05 (0.55, 1.98) | 0.887        | 0.94 (0.52, 1.69)    | 0.841        | 0.91 (0.48, 1.71) | 0.766   |
| Asian                  | 25 (1.1)      | 1.62 (0.64, 4.07)  | 0.310        | 1.46 (0.57, 3.77) | 0.429        | 0.88 (0.35, 2.21)    | 0.781        | 0.81 (0.32, 2.07) | 0.660   |
| Hispanic               | 50 (2.3)      | 0.44 (0.16, 1.24)  | 0.123        | 0.37 (0.11, 1.24) | 0.109        | 1.26 (0.61, 2.62)    | 0.532        | 1.01 (0.47, 2.17) | 0.985   |

The interaction between each race and NSAID use were all  $p \geq 0.072$  for acute inflammation and  $p \geq 0.348$  for chronic inflammation  
Abbreviations: 95% CI, 95% confidence interval; OR odds ratio.

\*Adjusted for baseline age, race, region, DRE (digital rectal examination), prostate volume, PSA (prostate-specific antigen), smoking, aspirin/NSAID use, and biopsy results.
